# Supplementary material
Source: MDPI journal article supplement (https://www.mdpi.com/2227-9040/6/4/47)
Supplement: s1 [file s1]

## Supplementary Data

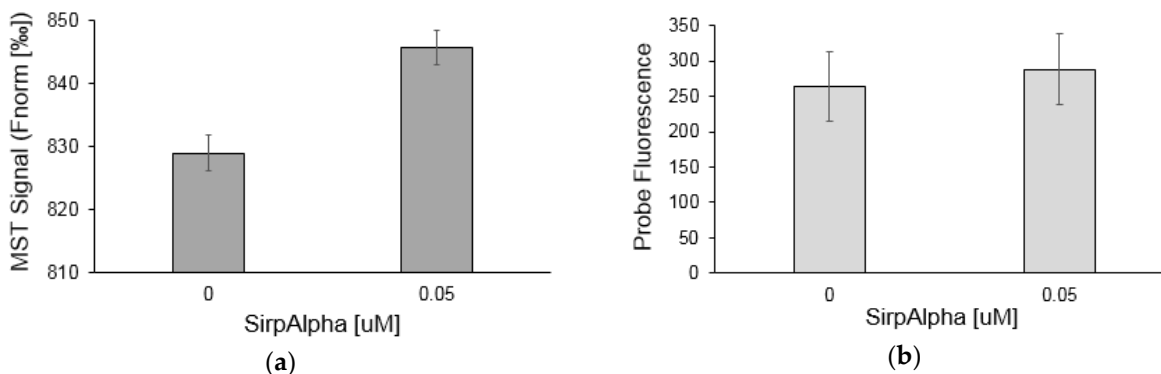

**Figure S1.** CD47 mimetic peptide fluorescent response to SIRPalpha. The CD47 mimetic probe IR-783 EVTELTREGE when exposed to human SIRPalpha: (a) Was found to exhibit a change in the thermophoretic signal which confirms binding, while (b) fluorescence in the unbound and bound state of the probe showed no significant change in intensity revealing that not all IR-783 peptide conjugates will produce “turn-on” fluorescence sensing.

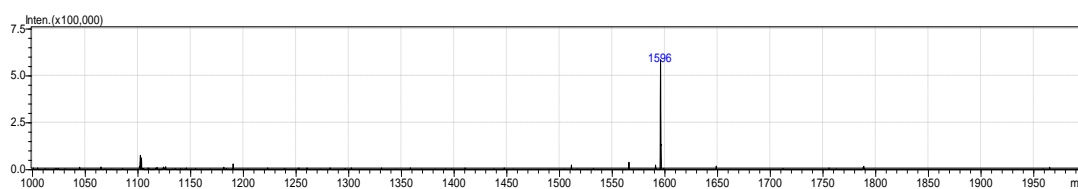

**Figure S2.** LCMS-8040 spectra of the lyophilized IR783-VSHPQAPF product revealed an M+H of 1596 m/z representing the expected mass of a single covalently linked IR-783 sodium adduct (molecular weight = 749.5) to a single VSHPQAPF peptide (molecular weight = 881) with removal of chlorine (molecular weight = 35.5) as was to be predicted for amine-substitution of the IR-783 by the free amino terminus of the VSHPQAPF.

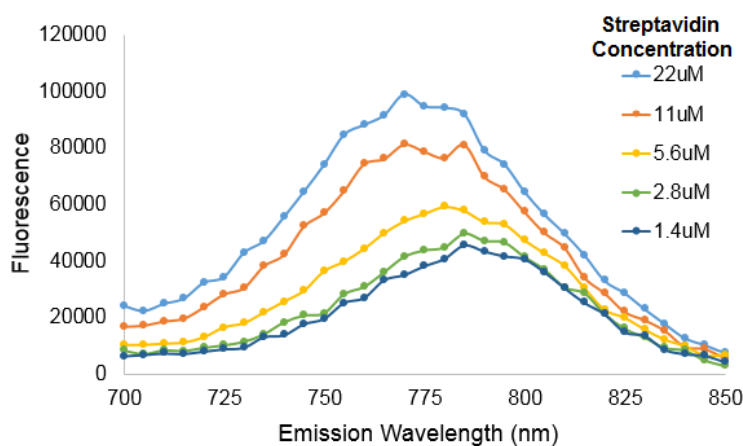

**Figure S3.** Fluorescence emission spectra for IR783-VSHPQAPF as a function of increasing concentrations of streptavidin (618 nm excitation wavelength). The fluorescence intensity increases linearly with streptavidin concentration and a blue shift in the emission maximum to lower wavelengths can similarly be observed.

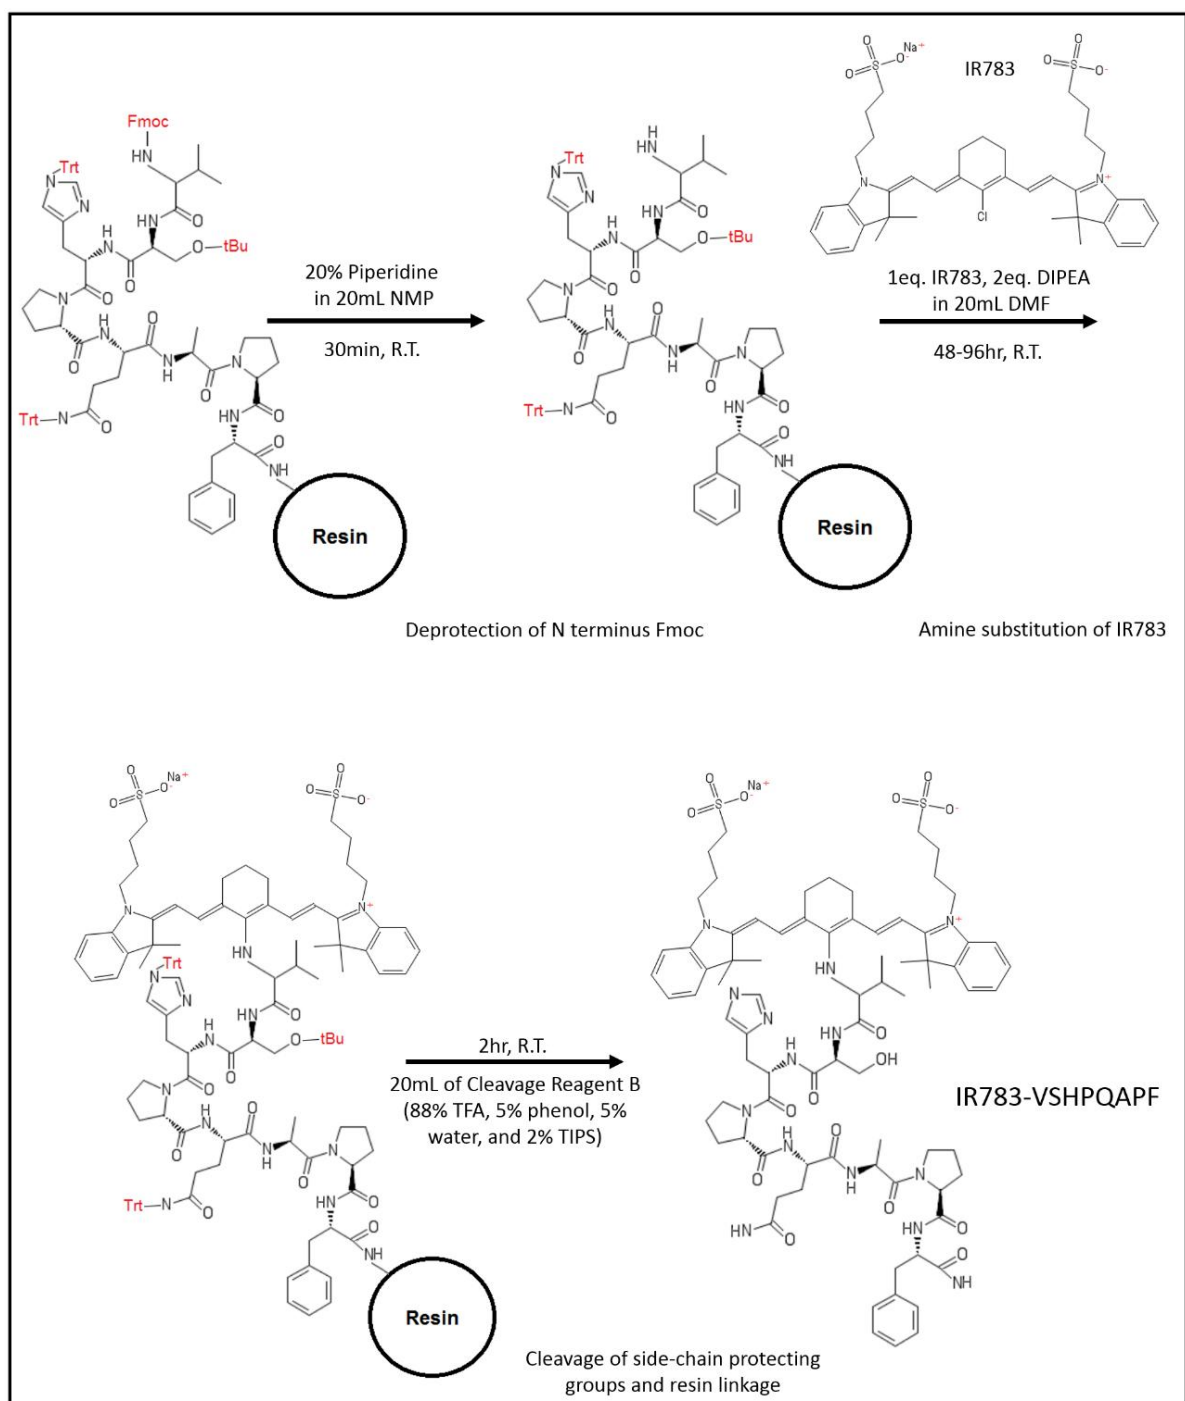

**Figure S4.** Scheme for the solid phase coupling strategy of IR-783 onto resin-bound peptide.

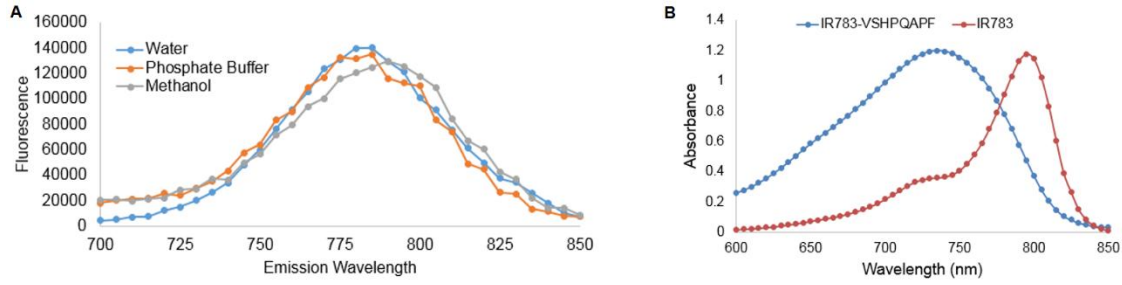

**Figure S5.** (A) Fluorescence emission spectra (618 nm excitation wavelength) for IR783-VSHPQAPF in different solvents (water, phosphate buffer, and methanol) showing a small red shift (~5 nm) for the peptide probe emission when using methanol as compared to PBS or water. (B) Absorption spectra of IR783 before (red spectrum) and after covalent coupling to the VSHPQAPF peptide (blue spectrum) showing a significant blue shift of the absorption maximum to lower wavelengths along with a broadening in the absorption spectra after coupling.

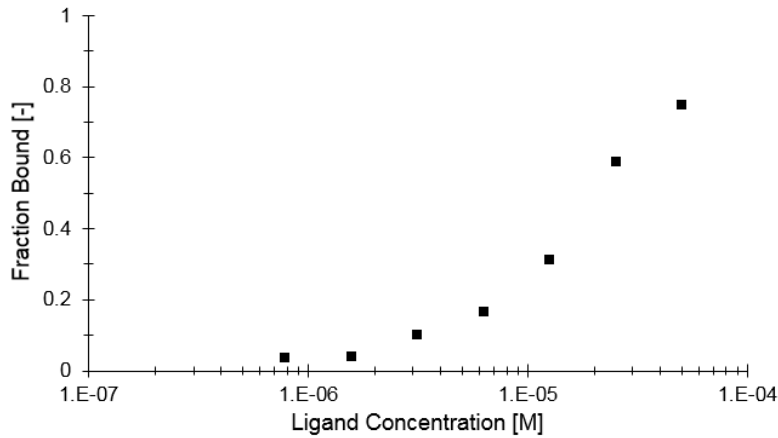

**Figure S6.** MST data collected for the IR783-VSHPQAPF peptide upon binding to increasing concentrations of streptavidin was fit to a Hill model for determining the affinity showing an EC<sub>50</sub> of  $20 \pm 5$   $\mu$ M which is in good agreement with the literature values for the VSHPQAPF peptide binding to streptavidin that been previously reported from 4.1  $\mu$ M to 79.5  $\mu$ M [35].
